# Supplementary material
Source: PubMed Central journal article supplement (PMC1828638)
Supplement: NIHMS17028-supplement-suppfig.pdf [file NIHMS17028-supplement-suppfig.pdf]

## Supplemental Data

### Identification of a T Lineage-Committed

### Progenitor in Adult Blood

Andreas Krueger and Harald von Boehmer

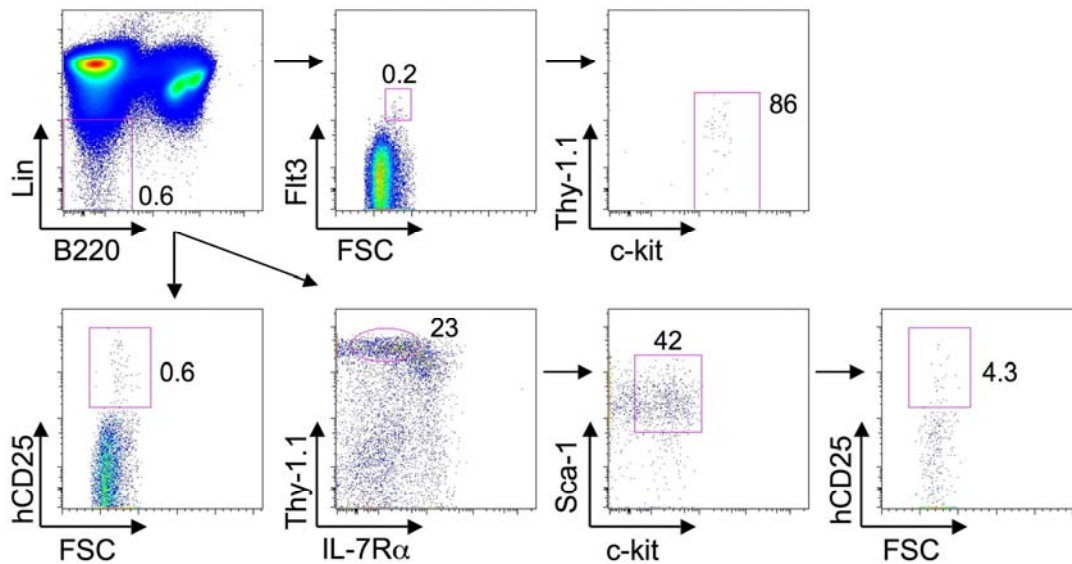

**Figure S1. Proportion of hCD25<sup>+</sup> Cells in the Lin<sup>-</sup>B220<sup>-</sup>Thy-1.1<sup>+</sup>IL-7R $\alpha$ <sup>+</sup>c-kit<sup>lo</sup>Sca-1<sup>+</sup>Flt3<sup>-</sup> Population in Peripheral Blood**

Peripheral blood cells were stained with antibodies against lineage markers, B220, Thy-1.1, c-kit, Sca-1, hCD25 and Flt3 (upper panels) or IL-7R $\alpha$  (lower panels). The gating strategy is indicated by arrows. Numbers in plots indicate percentages of cells within gates.
